# Supplementary material for: Tear Proteomics Study of Dry Eye Disease: Which Eye Do You Adopt as the Representative Eye for the Study?
Source: MDPI journal article supplement (doi:10.3390/ijms22010422), 2021-01-03
Supplement: s1 [file s1]

# Tear Proteomics Study of Dry Eye Disease: Which Eye Do You Adopt as the Representative Eye for the Study?

Ming-Tse Kuo, Po-Chiung Fang, Shu-Fang Kuo, Alexander Chen and Yu-Ting Huang

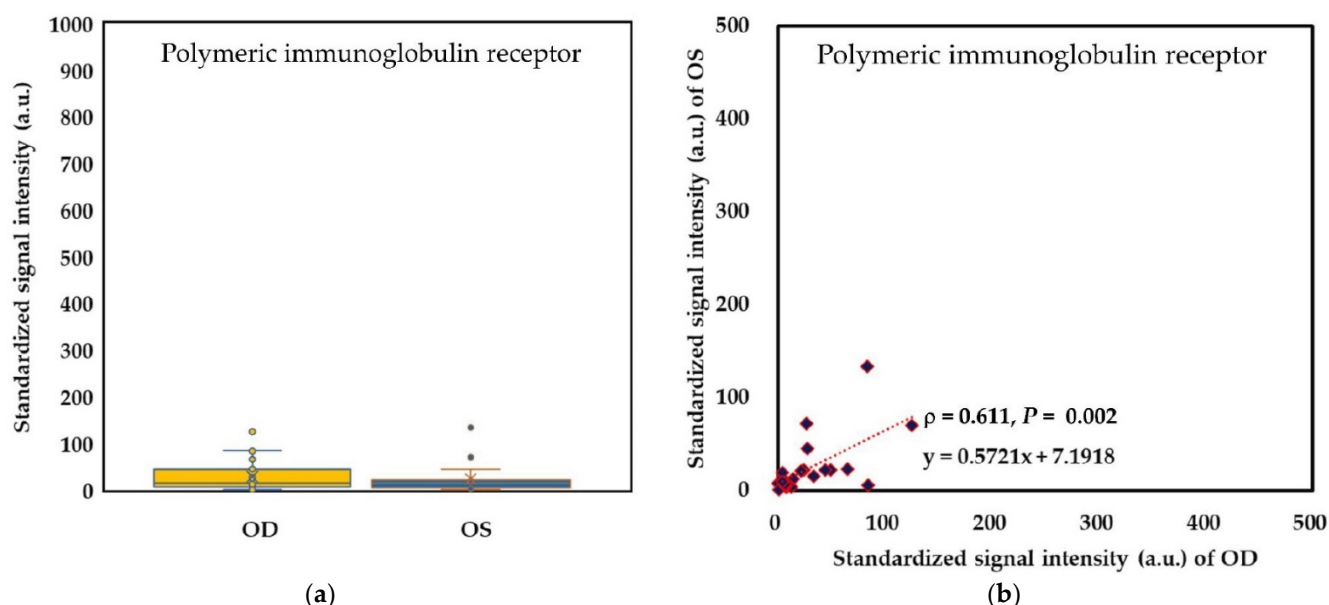

**Figure S1.** (a) Comparison of lactoferrin-corrected standardized signals for polymeric immunoglobulin receptor in binocular tear samples of dry eye subjects ( $N = 23$ ,  $p = 0.3972$ ). (b) Binocular association of lactoferrin-corrected standardized signals for polymeric immunoglobulin receptor in tear samples of dry eye patients ( $N = 23$ ).
